# Supplementary material for: A sequential template strategy toward hierarchical hetero-metal phosphide hollow nanoboxes for electrocatalytic oxygen evolution
Source: Royal Society of Chemistry journal article supplement (doi:10.1039/d0ta10835a), 2020-12-22
Supplement: d0ta10835a1.pdf [file d0ta10835a1.pdf]

Electronic Supplementary Information for

## **A Sequential Template Strategy toward Hierarchical Hetero-Metal Phosphide Hollow Nanoboxes for Electrocatalytic Oxygen Evolution**

Yang Wang,<sup>a,b,c,+</sup> Lizhi Sun,<sup>b,+</sup> Longgang Lu,<sup>a</sup> Dongdong Xu,<sup>b</sup> Qingli Hao,<sup>a,\*</sup> and Ben Liu<sup>b,c,\*</sup>

<sup>a</sup>Key Laboratory for Soft Chemistry and Functional Materials, Nanjing University of Science and Technology, Ministry of Education, Nanjing 210094, China. \*E-mail: qinglihao@njust.edu.cn

<sup>b</sup>Jiangsu Key Laboratory of New Power Batteries, Jiangsu Collaborative Innovation Center of Biomedical Functional Materials, School of Chemistry and Materials Science, Nanjing Normal University, Nanjing 210023, China. \*E-mail: ben.liu@nynu.edu.cn

<sup>c</sup>College of Chemistry, Sichuan University, Chengdu 610064, China

<sup>+</sup>Yang Wang and Lizhi Sun contribute equally to this work.

## 1. Electrochemical Tests

All the electrocatalytic measurements were carried out on a CHI 660E electrochemical analyzer. The Linear sweep voltammetry (LSV) was carried at a scanning rate of 5 mV s<sup>-1</sup>. The Tafel slopes were calculated using the following formula  $\eta = b \log(j/j_0)$ , where  $\eta$  is the overpotential,  $b$  is the Tafel slope,  $j$  is the current density and  $j_0$  is the exchange current density. Chronoamperometry measurements ( $i$ - $t$  curves) was carried out under 1.515 V vs.RHE (10 mA cm<sup>-2</sup>). The electrochemically active surface areas (ECSAs) of the catalysts were evaluated using the double-layer capacitance based on recognized electrochemical method. The CVs were obtained in the non-faradaic region (0.77-0.88 V vs. RHE) at scan rates of 20, 40, 60, 80,100, etc. mV s<sup>-1</sup>. The potentials were converted to the reversible hydrogen electrode (RHE) by following equation:  $E_{RHE} = E_{Ag/AgCl} + 0.0592 \cdot pH + 0.197$ . The electrochemical impedance spectroscopy (EIS) was carried out in a frequency range from 0.01 Hz to 100 kHz at fixed voltage (1.526 V vs.RHE).

## 2. Materials Characterization.

SEM was performed using JEOL JSM-7800F. TEM and HRTEM were carried out using a JEOL 2010 transmission electron microscope. HAADFSTEM was taken on an FEI, Talos F200X apparatus, which is equipped with STEM and EDS detectors for elemental mapping analysis. Wide-angle XRD was recorded using a D/max 2500 VL/PC diffractometer (Japan). XPS were performed on a scanning X-ray microprobe (Thermo ESCALAB 250Xi). The N<sub>2</sub> adsorption/desorption isotherms and pore size distribution were analyzed respectively by the BET and BJH method, which were measured on an ASAP 2010 M+C analyzer.

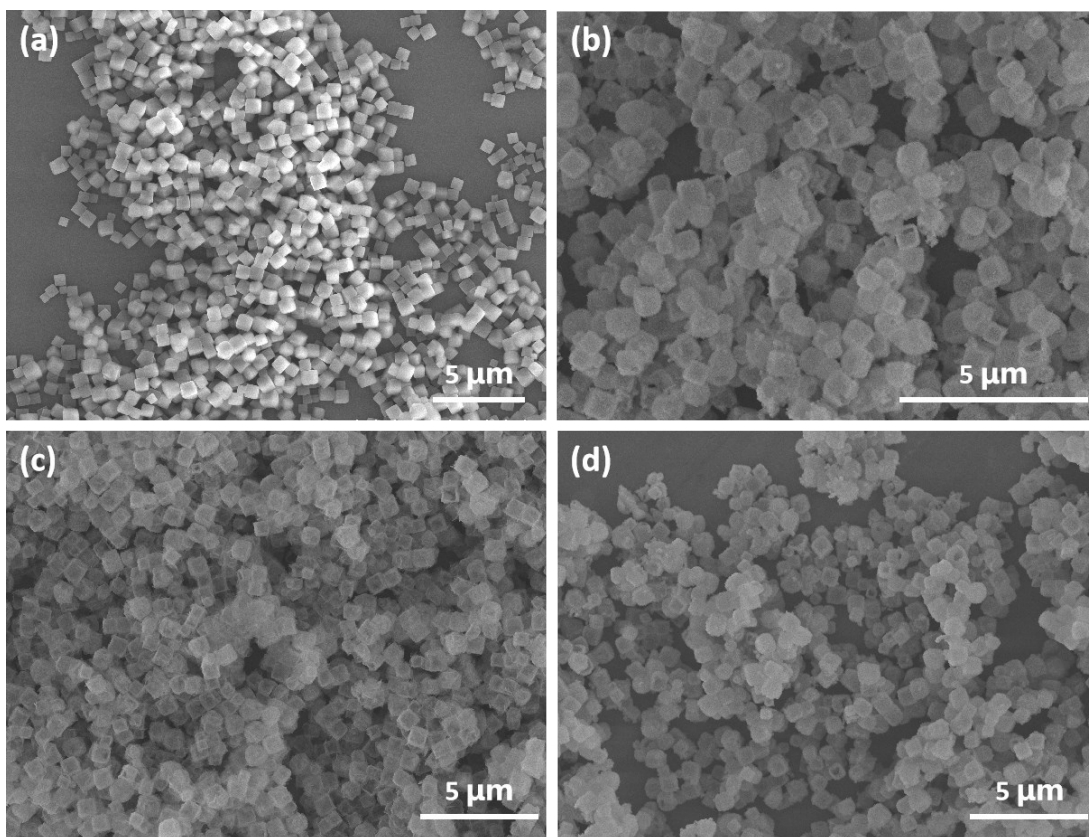

**Fig. S1** (a, b, c, d) Low-magnification SEM images of the ZIF-67, Co-Ni LDHs, Co-Co LDHs and Co-Ni LDH@Co-Ni-Fe PBAs.

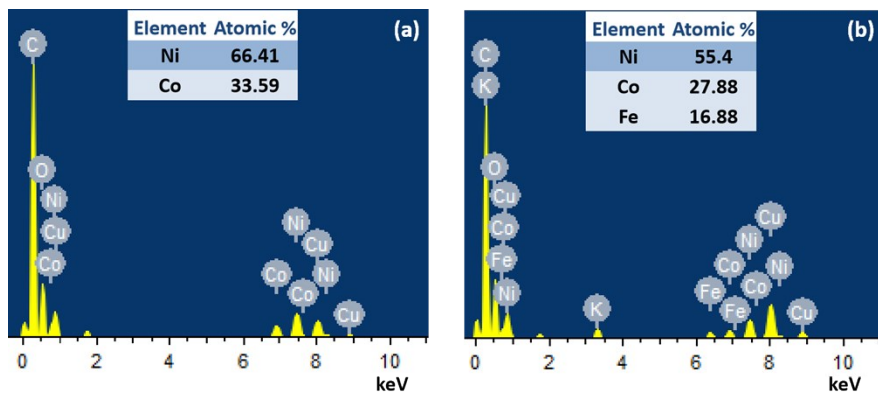

**Fig. S2** TEM-EDS elemental analysis of (a) Co-Ni LDHs and (b) Co-Ni LDH@Co-Ni-Fe PBAs.

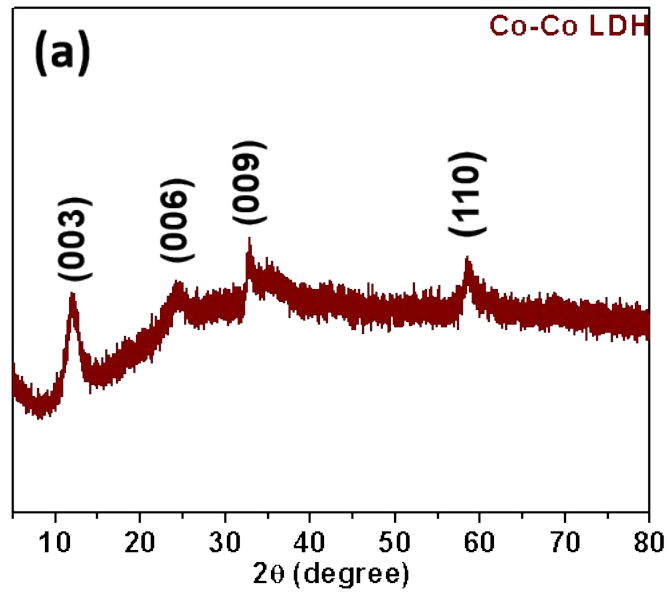

Fig. S3 XRD pattern of the Co-Co LDHs.

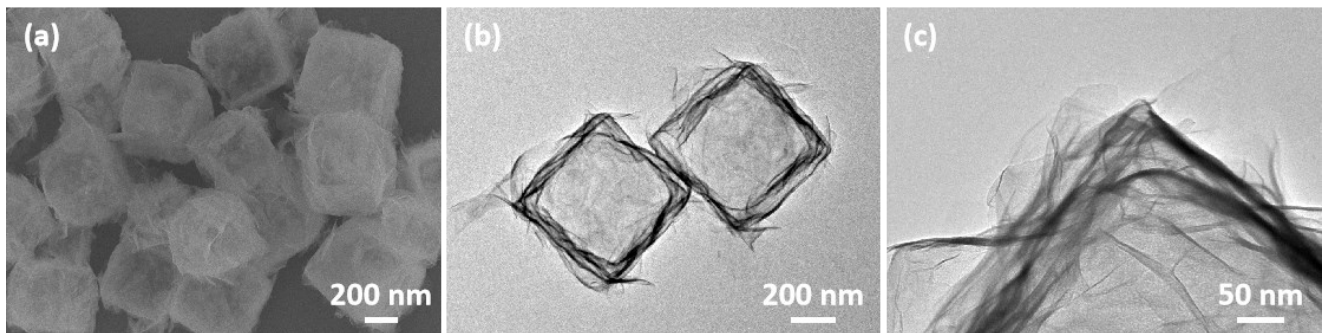

Fig. S4 (a) SEM and (b,c) TEM images of Co-Co LDHs.

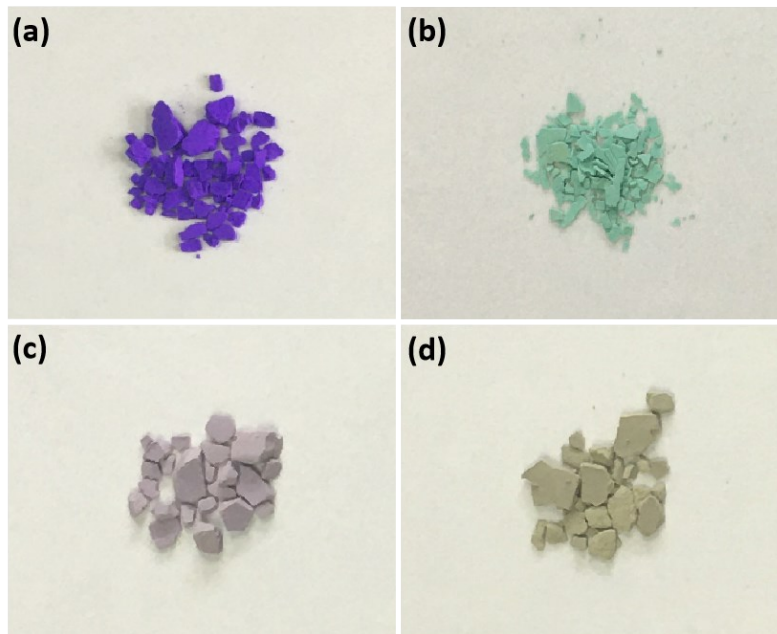

**Fig. S5** Photographs of (a) ZIF-67, (b) Co-Ni LDHs, (c) Co-Co LDHs, and (d) Co-Ni LDH@Co-Ni-Fe PBAs coated on papers.

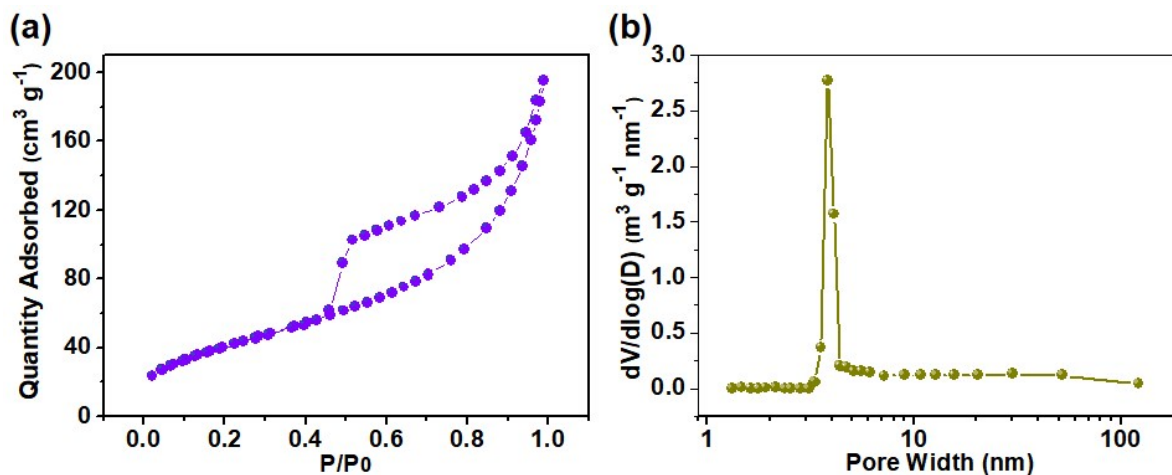

**Fig. S6** (a) N<sub>2</sub> sorption isotherms and corresponding (b) pore size distributions of Co-Ni LDH@Co-Ni-Fe PBAs.

**Fig. S6a** shows the nitrogen adsorption/desorption isotherm plot of Co-Ni LDH@Co-Ni-Fe PBAs, and the Brunauer-Emmett-Teller (BET) specific surface area of Co-Ni LDH@Co-Ni-Fe PBAs is determined to be 151.52 m<sup>2</sup> g<sup>-1</sup>. The corresponding Barrett-Joyner-Halenda (BJH) curve (**Fig. S6b**) indicates the existence of nanosized pores with a narrow pore size distribution centered at 3.4 nm.

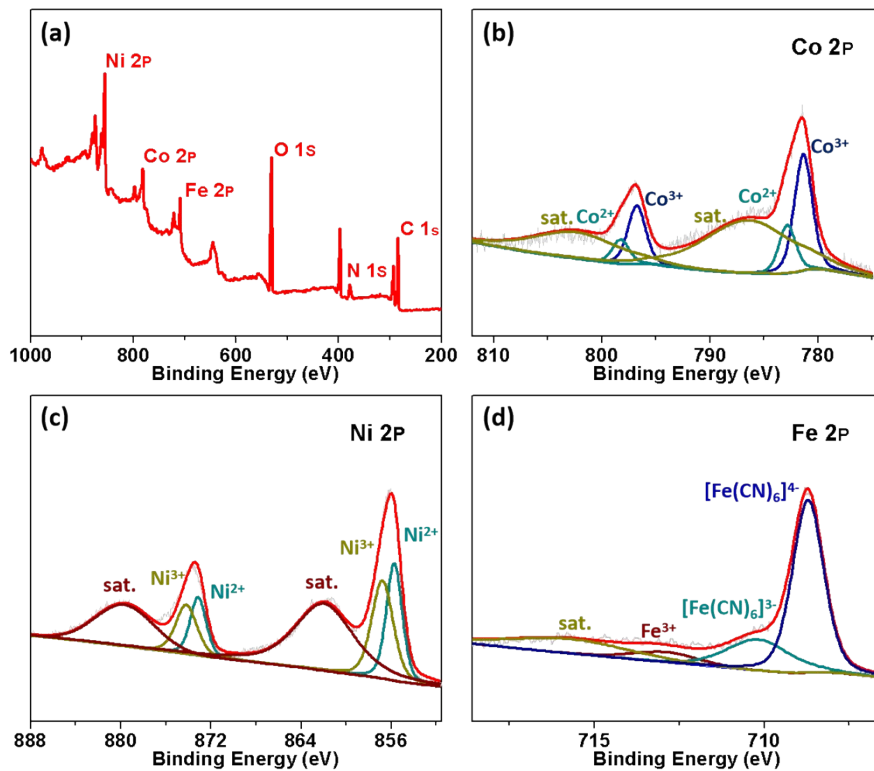

**Fig. S7** (a) XPS survey spectrum of Co-Ni LDH@Co-Ni-Fe PBAs; High-resolution XPS spectra of Co-Ni LDH@Co-Ni-Fe PBAs: (b) Co 2p, (c) Ni 2p and (d) Fe 2p regions.

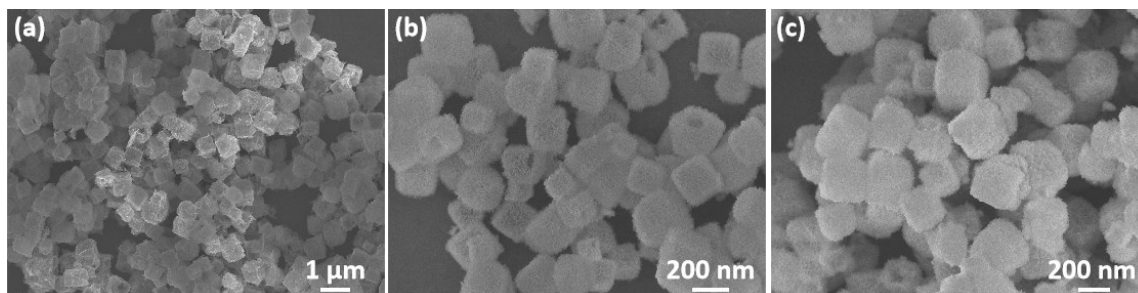

**Fig. S8** SEM images of (a) Co-P HNBs, (b) Co-Ni-P HNBs, and (c) Co-Ni-Fe-P HNBs.

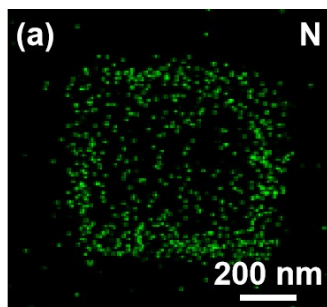

Fig. S9 STEM EDS mapping image of N element in Co-Ni-Fe-P HNBs.

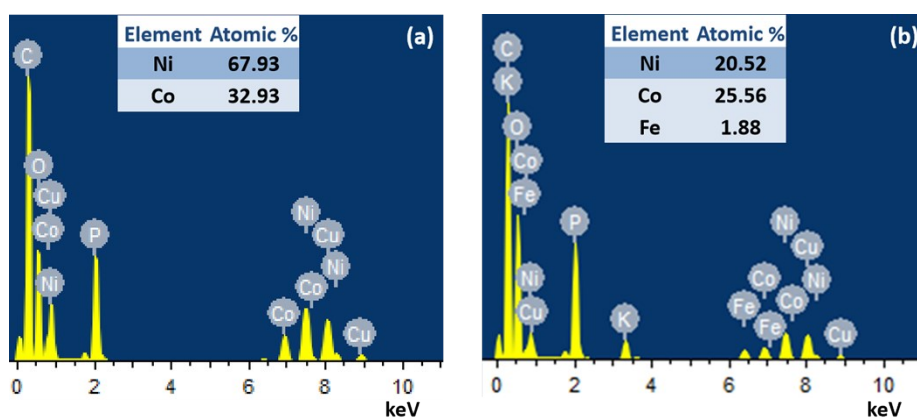

Fig. S10 TEM EDS elemental analysis of (a) Co-Ni-P HNBs and (b) Co-Ni-Fe-P HNBs.

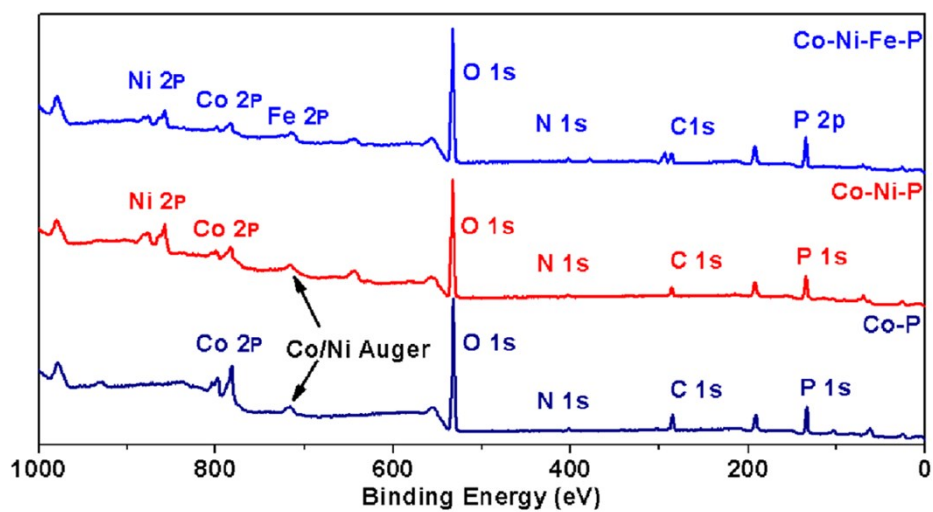

Fig. S11 XPS survey of the Co-P HNBs, Co-Ni-P HNBs, and Co-Ni-Fe-P HNBs.



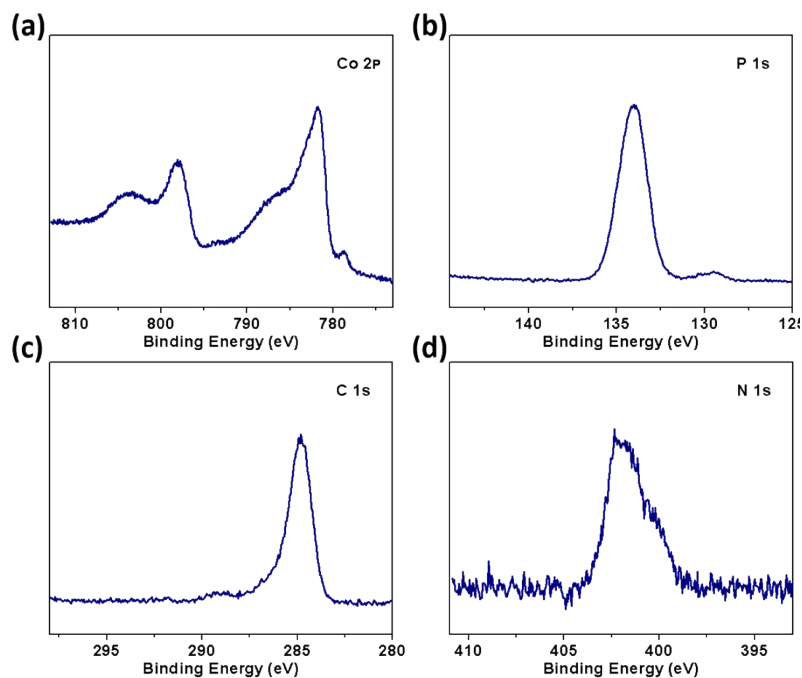

**Fig. S12** High-resolution XPS spectra of (a) Co 2p, (b) P 2p, (c) C 1s, and (d) N1s of Co-P HNBs.

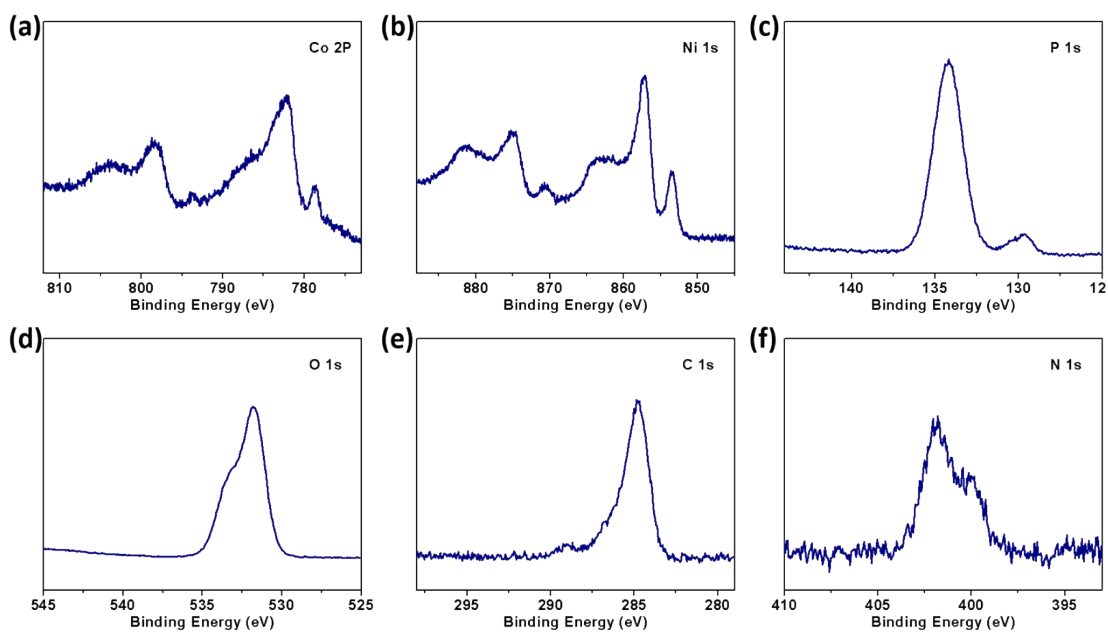

**Fig. S13** High-resolution XPS spectra of (a) Co 2p, (b) Ni 2p, (c) P 2p, (d) O 1s, (e) C 1s, and (f) N 1s of Co-Ni-P HNBs.



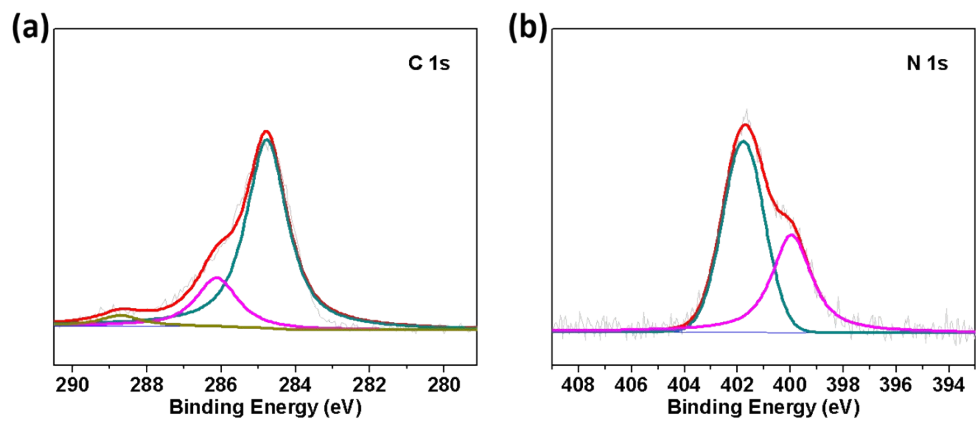

Fig. S14 High-resolution XPS spectra of (a) C 1s and (b) N 1s of Co-Ni-Fe-P HNBs.

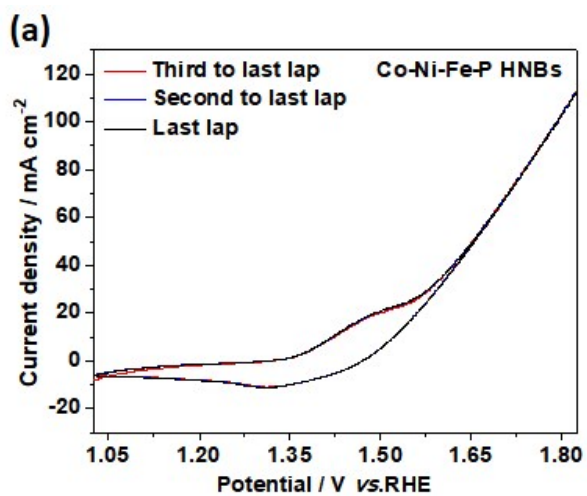

Fig. S15 CV curves of (a) Co-Ni-Fe-P HNBs.

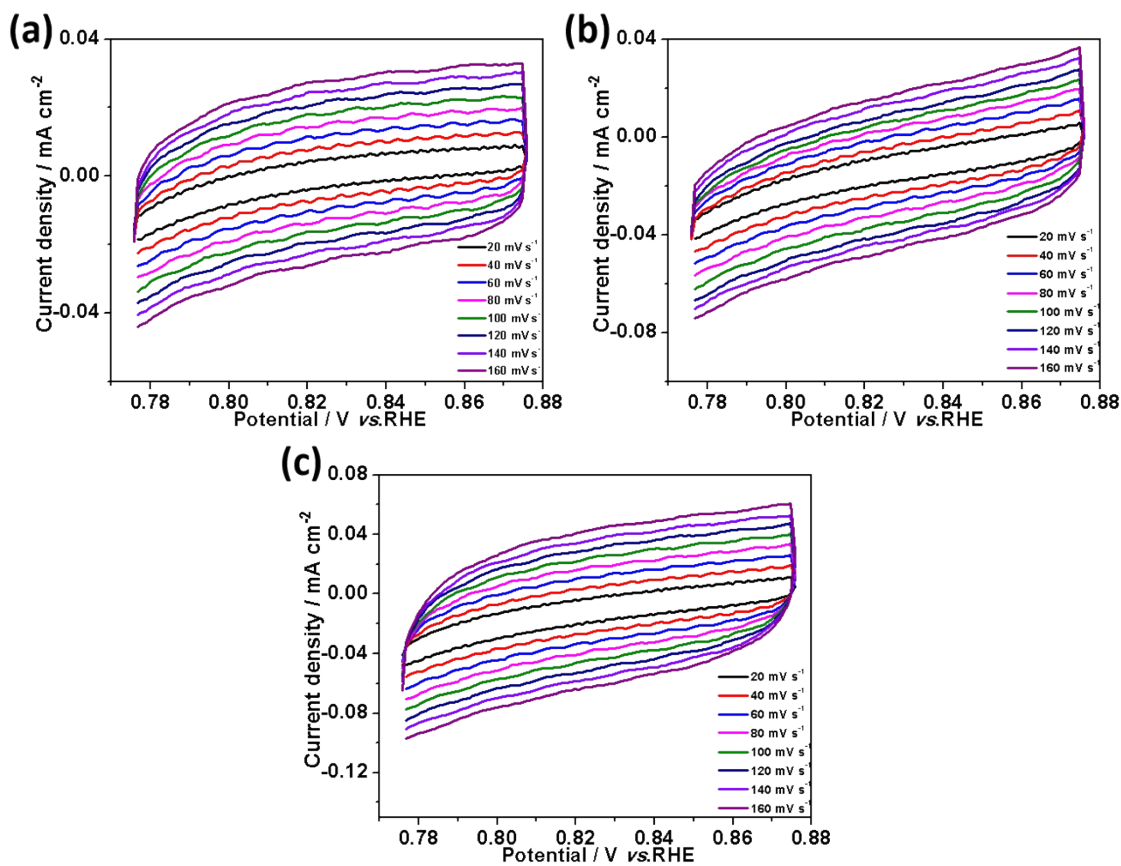

**Fig. S16** CV curves of (a) Co-P HNBs, (b) Co-Ni-P HNBs, and (c) Co-Ni-Fe-P HNBs under different scan rates.

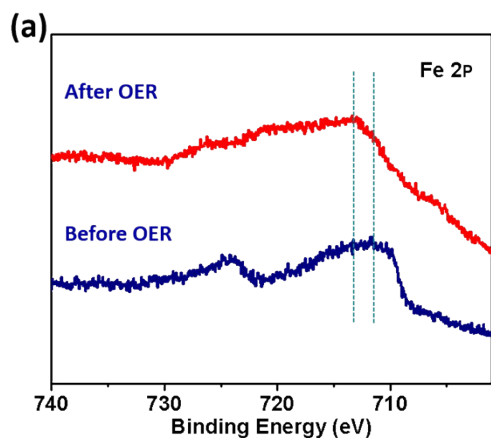

**Fig. S17** High-resolution XPS spectra of Fe 2p of Co-Ni-Fe-P HNBs before and after OER tests.

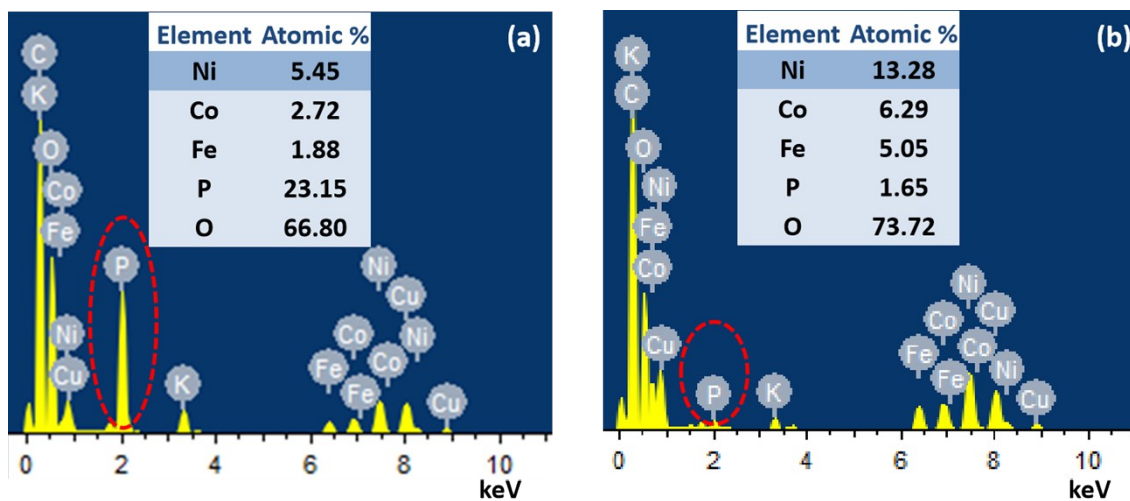

**Fig. S18** TEM EDS elemental analysis of Co-Ni-Fe-P HNBS (a) before and (b) after OER tests.

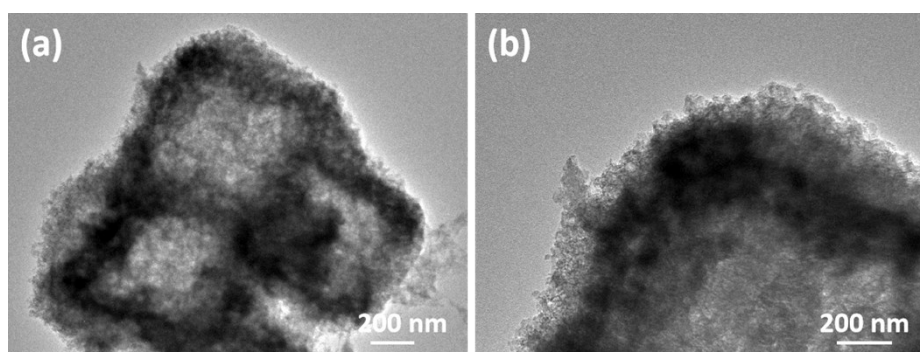

**Fig. S19** (a,b) TEM images of Co-Ni-Fe-P HNBS after OER tests.

**Table S1** Comparisons of properties of previously reported Fe-Co-Ni-based unitary/hetero-metal catalysts.

| Typical examples             | Overpotential (mV)<br>at 10 mA cm <sup>-2</sup> | Ref.                                               |
|------------------------------|-------------------------------------------------|----------------------------------------------------|
| Hierarchical Co-Ni-Fe-P HNBs | 249                                             | <b>This work</b>                                   |
| Hierarchical Co-Ni-P HNBs    | 287                                             | <b>This work</b>                                   |
| Hierarchical Co-P HNBs       | 324                                             | <b>This work</b>                                   |
| CoP nanoframes               | 323                                             | <i>ACS Catal.</i> <b>2019</b> , 10, 412            |
| CoP@CNs                      | 326                                             | <i>Adv. Mater.</i> <b>2020</b> , 32, 2003649       |
| CoP/NCNHP                    | 310                                             | <i>J. Am. Chem. Soc.</i> <b>2018</b> , 140, 2610   |
| Ni <sub>2</sub> P@C/G        | 285                                             | <i>Chem. Commun.</i> <b>2017</b> , 53, 8372        |
| Ni-P Nanoplates              | 300                                             | <i>Energy Environ. Sci.</i> <b>2016</b> , 9, 1246  |
| Co-Fe-P nanoframes           | 298                                             | <i>Chem. Sci.</i> <b>2019</b> , 10, 464            |
| CoNiP nanosheets             | 280                                             | <i>J. Am. Chem. Soc.</i> <b>2018</b> , 140, 5241   |
| Ni-Co-P hollow nanobricks    | 270                                             | <i>Energy Environ. Sci.</i> <b>2018</b> , 11, 872  |
| Fe-Co-P nanoboxes            | 269                                             | <i>Energy Environ. Sci.</i> <b>2019</b> , 12, 3348 |
| CoP@FeCoP micro-polyhedra    | 238                                             | <i>Chem. Eng. J.</i> <b>2021</b> , 403, 126312     |
| Honeycomb NiCoFeP/C          | 270                                             | <i>Chem. Commun.</i> <b>2019</b> , 55, 10896       |
| NiCoFe hollow nanobox        | 273                                             | <i>Small</i> <b>2018</b> , 14, 1802442.            |
